# Supplementary material for: Independent introductions and admixtures have contributed to adaptation of European maize and its American counterparts
Source: PLoS Genet. 2017 Mar 16;13(3):e1006666. doi: 10.1371/journal.pgen.1006666 (PMC5373671; doi:10.1371/journal.pgen.1006666)
Supplement: S6 Table — (XLSX) [file pgen.1006666.s019.xlsx]

## Sheet: S6 Table
S6 Table. Enrichment test for DS_candidates within gene networks.
We grouped networks into clusters (when >50% of genes were common).
Network cluster number, network names, number of Genes in the network, number of genes from which we computed Fst, Sum.Stat, P-values as well as groups (G1, G2) for which the test was significant are indicated.
Network Cluster	Network Name	#Genes	#Genes_Fst	Sum.Stat	P.value	G1	G2
1	2-ketoglutarate dehydrogenase complex	26	24	-12.232	0.006	Tropical	SpanIt
2	abscisic acid biosynthesis	23	22	-9.576	0.009	ANF	ENF
3	acetaldehyde biosynthesis I	27	27	-11.246	0.008	ANF	ENF
3	leucine degradation III	76	74	-20.855	0.002	ANF	ENF
3	phenylethanol biosynthesis	72	69	-19.431	0.010	Tropical	SpanIt
3	pyruvate fermentation to ethanol II	27	27	-11.246	0.008	ANF	ENF
3	valine degradation II	76	74	-20.855	0.007	ANF	ENF
4	acetate conversion to acetyl-CoA	6	6	-7.126	0.007	CBD	EF
5	acyl-CoA hydrolysis	22	21	-35.986	0.003	SpanIt	EF
5	omega-hydroxylation of caprate and laurate	5	5	-39.000	0.001	SpanIt	EF
6	alanine biosynthesis II	12	12	-8.152	0.007	ANF	ENF
6	alanine degradation II to D-lactate	14	14	-8.947	0.007	ANF	ENF
7	allantoin degradation IV anaerobic	4	4	-4.720	0.010	Tropical	CBD
8	arginine degradation I arginase pathway	18	18	-46.219	0.006	CBD	EF
8	arginine degradation VI arginase 2 pathway	4	4	-5.838	0.004	NF	EF
			4	-7.192	0.002	NF	SpanIt
			4	-6.495	0.000	NF	CBD
			4	-43.443	0.005	CBD	EF
9	arginine degradation III arginine decarboxylase-agmatinase pathway	4	4	-43.656	0.003	CBD	EF
			4	-6.612	0.004	NF	SpanIt
			4	-5.813	0.003	Tropical	CBD
			4	-7.645	0.001	NF	CBD
			4	-6.257	0.001	NF	EF
			4	-4.928	0.009	NF	Tropical
9	putrescine biosynthesis IV	5	5	-7.467	0.002	NF	CBD
			5	-43.135	0.005	CBD	EF
			5	-5.561	0.010	Tropical	CBD
			5	-5.756	0.005	NF	EF
			5	-6.638	0.003	NF	SpanIt
10	β-alanine biosynthesis II	40	37	-41.486	0.001	SpanIt	EF
11	β-caryophyllene biosynthesis	8	8	-8.964	0.000	Tropical	EF
			8	-9.938	0.010	CBD	EF
12	coenzyme A biosynthesis	10	10	-47.059	0.003	CBD	EF
13	coniferin metabolism	6	6	-6.421	0.007	Tropical	CBD
13	monolignol glucosides biosynthesis	6	6	-6.421	0.007	Tropical	CBD
14	fatty acid β-oxidation IV unsaturated, even number	17	17	-12.053	0.008	NF	SpanIt
14	isoleucine degradation I	29	28	-11.897	0.006	ANF	ENF
14	valine degradation I	59	56	-45.098	0.002	SpanIt	EF
15	galactose degradation III	79	76	-34.539	0.005	Tropical	CBD
15	galactose degradation I Leloir pathway	58	57	-23.630	0.007	Tropical	CBD
15	GDP-L-fucose biosynthesis I from GDP-D-mannose	24	24	-13.871	0.006	Tropical	CBD
15	melibiose degradation	5	4	-5.485	0.002	SpanIt	CBD
15	stachyose degradation	73	70	-31.807	0.004	Tropical	CBD
15	UDP-galactose biosynthesis	42	41	-17.567	0.010	Tropical	CBD
15	UDP-galactose biosynthesis salvage pathway from galactose using UDP-glucose	66	64	-30.346	0.004	Tropical	CBD
15	UDP-L-arabinose biosynthesis II from L-arabinose	5	4	-5.502	0.004	Tropical	CBD
16	gibberellin biosynthesis III early C-13 hydroxylation	8	8	-6.378	0.005	NF	EF
17	histidine biosynthesis	29	29	-10.594	0.010	ANF	ENF
18	cis-zeatin biosynthesis	11	11	-11.530	0.000	NF	SpanIt
			11	-8.047	0.001	NF	Tropical
18	trans-zeatin biosynthesis	9	9	-7.516	0.003	NF	Tropical
			9	-8.293	0.008	NF	SpanIt
19	leucopelargonidin and leucocyanidin biosynthesis	11	11	-9.479	0.006	NF	CBD
20	pentose phosphate pathway oxidative branch	25	25	-17.112	0.000	NF	CBD
21	pyrimidine deoxyribonucleotides de novo biosynthesis I	39	34	-19.245	0.004	ANF	ENF
22	pyrimidine ribonucleosides degradation II	6	6	-8.142	0.000	ANF	ENF
23	tetrapyrrole biosynthesis I	33	31	-13.293	0.003	NF	EF
24	tRNA charging pathway	78	76	-24.888	0.003	NF	Tropical
			75	-27.312	0.007	NF	SpanIt
			76	-27.015	0.010	Tropical	CBD
25	UDP-glucose biosynthesis from glucose 6-phosphate	80	76	-21.758	0.005	NF	Tropical
			69	-20.501	0.007	SpanIt	CBD
